# Supplementary material
Source: PubMed Central journal article supplement (PMC7416697)

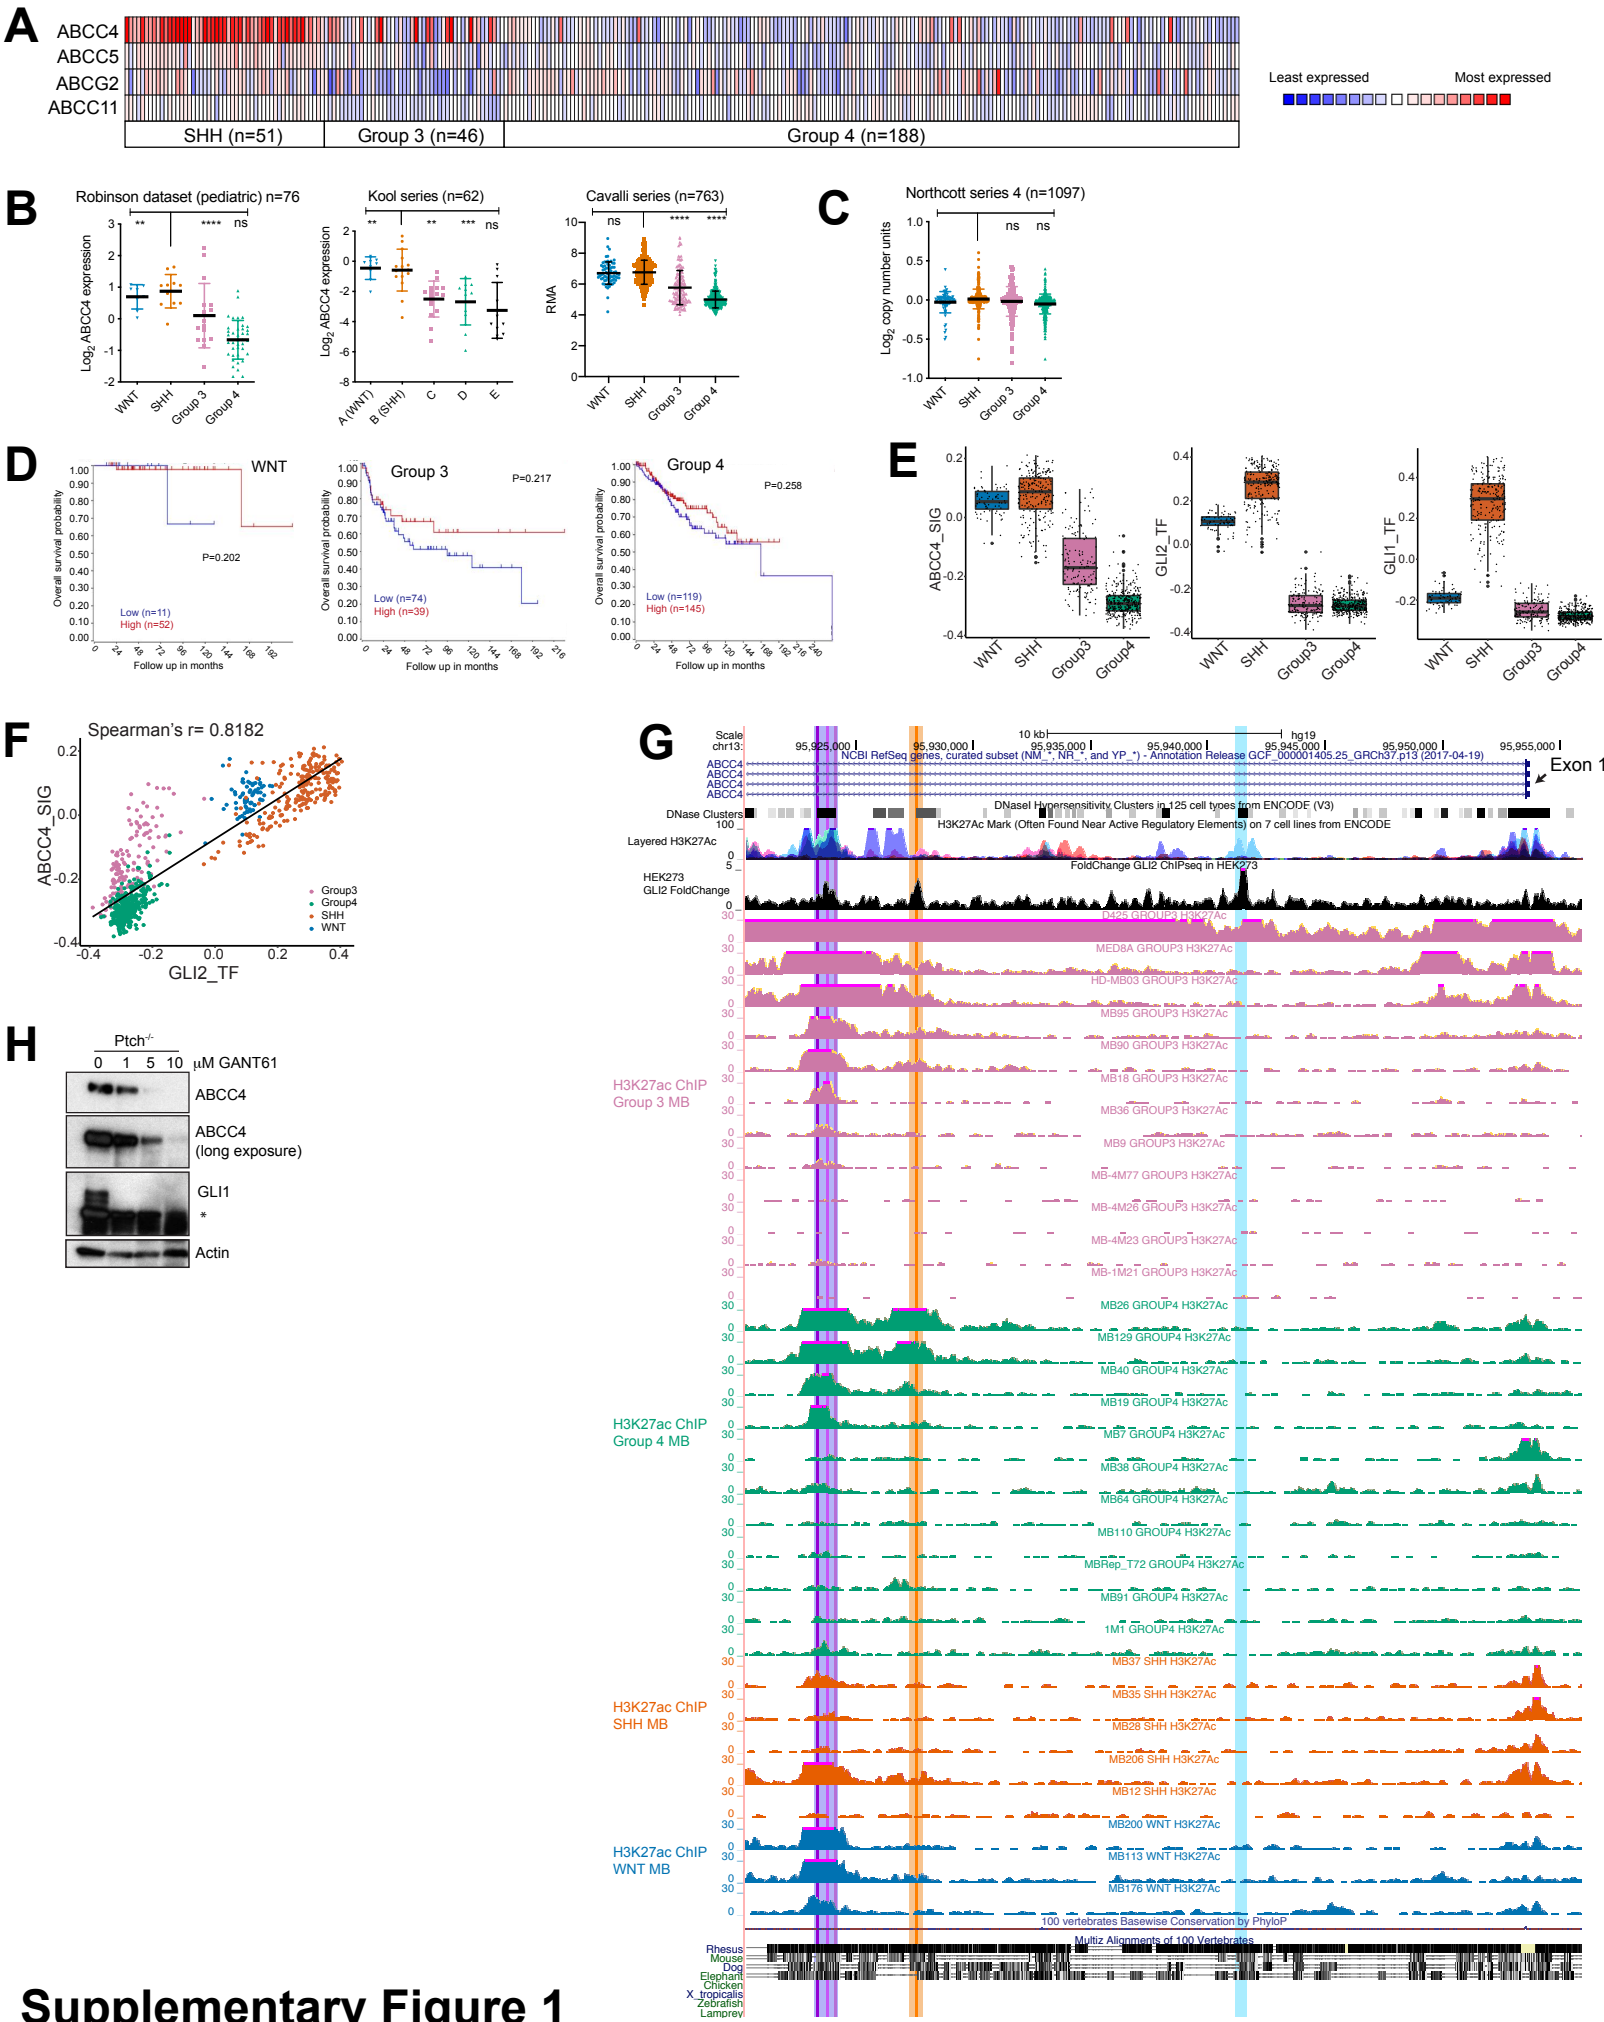

Supplementary Figure 1

**A**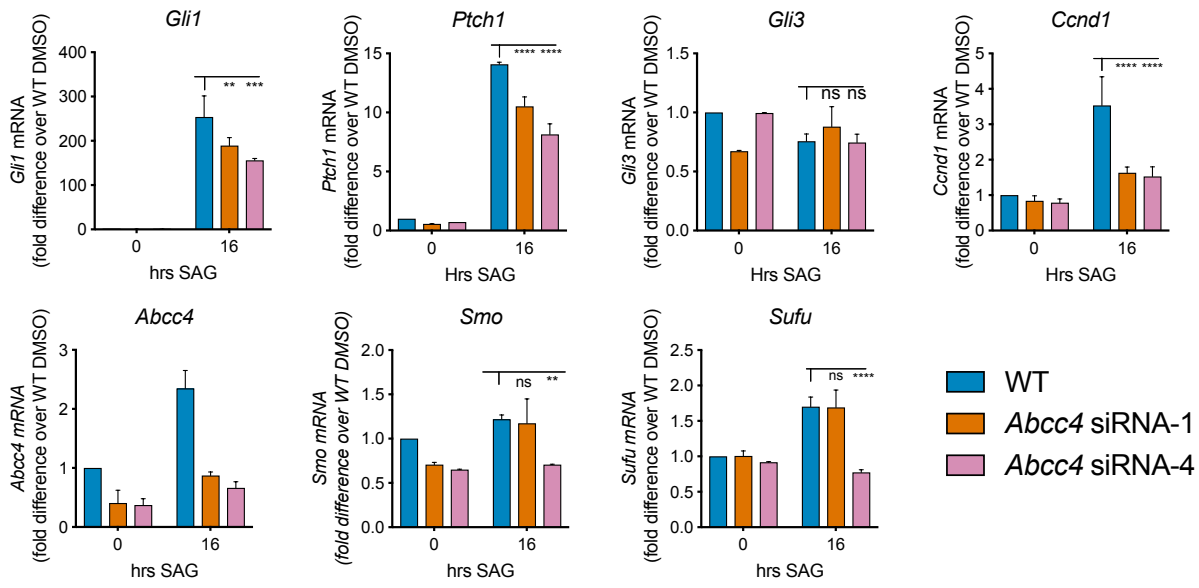**Supplementary Figure 2**

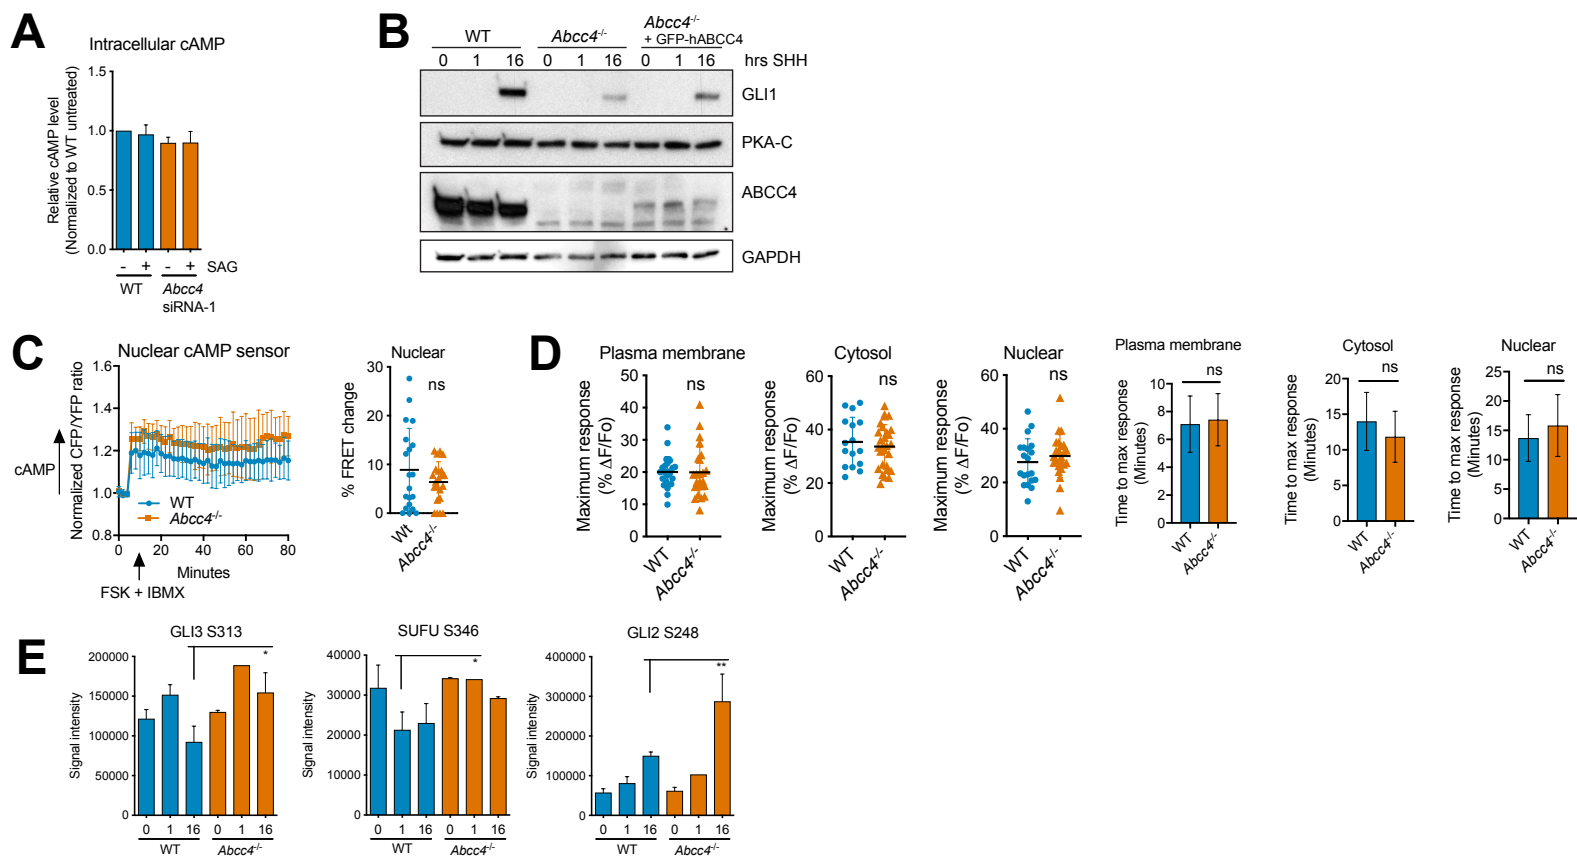

Supplementary Figure 3

Supplement: NIHMS1593837-supplement-1.pdf [file NIHMS1593837-supplement-1.pdf]
